# Supplementary material for: Predictive value of immunoglobulin G, activated partial thromboplastin time, platelet, and indirect bilirubin for delayed viral clearance in patients infected with the Omicron variant
Source: PeerJ. 2023 May 19;11:e15443. doi: 10.7717/peerj.15443 (PMC10202103; doi:10.7717/peerj.15443)
Supplement: Supplemental Information 1 [file peerj-11-15443-s001.xlsx]

## Sheet: Sheet1
age	Virus shedding durations	Dbil	Tbil	CRP	IgG	APTT	MB	Lymphocyte	PLA	WBC	Cr	Neu	sex
81	9	8.1	18	34.67	402.84	25.8	139.1	1.6	206	13.1	86	10.7	male
91	2	3.5	13	0.8	6.73	24.8	17.8	1.3	204	5.43	51	3.8	female
90	2	0.5	8	3.55	22.5	26.7	45.1	1.9	266	8.23	52	5.8	female
72	3	1.3	7	9.90	20.91	24.8	132.5	1.1	168	5.28	67	3.7	female
64	2	0.1	7	0.8	175.5	23.4	70.4	0.8	215	6.08	98	5.0	male
90	3	2.5	8	6.56	23.63	26.8	49.9	1.4	206	6.59	55	4.7	female
89	4	2.1	9	6.11	1.66	27.6	204.0	1.6	272	9.1	64	6.6	male
87	20	2.9	11	19.19	0.5	31.4	153.0	0.9	122	4.62	121	2.9	female
65	2	0.8	6	0.8	483.57	29.6	24.0	1.1	243	6.35	52	4.6	male
43	1	0.2	9	17.47	15.2	38.4	114.0	1.0	253	3.64	34	2.2	female
60	5	1.7	10	9.47	0.22	39.6	47.5	1.5	121	4.9	70	2.9	male
87	1	0.2	6	5.92	10.83	27.4	93.6	1.5	244	5.83	116	3.7	female
70	13	0.1	4	59.64	10.68	24.8	209.0	0.6	326	8.78	77	7.8	female
93	4	9.6	21	177.28	12.54	26.5	155.7	1.2	284	7.94	59	6.1	female
89	2	5.8	12	11.00	78.31	34.2	28.5	1.0	207	6.88	91	5.2	male
92	19	0.4	7	11.57	1.67	33.6	76.9	1.9	184	7.61	70	5.0	male
100	2	1.3	7	4.95	25.06	35.9	5.0	1.7	415	8.17	99	5.4	female
95	3	0.9	8	15.59	56.98	20.9	13.6	1.8	191	7.26	41	4.5	male
97	2	1.8	8	21.39	35.37	31.6	78.2	0.8	172	3.37	104	2.1	female
91	8	8.8	17	7.42	8.06	41.9	95.2	1.7	145	5.7	72	3.2	female
90	5	2.7	12	37.22	5.67	21.1	500	1.6	121	10.47	184	8.4	female
59	8	2.0	10	10.97	0.46	29.5	29.9	1.7	143	4.68	58	2.5	female
93	18	2.4	9	9.65	0.31	25.3	382.4	0.5	144	3.91	45	3.2	female
62	4	0.5	7	0.8	35.42	29.8	25.3	1.2	168	3.76	56	2.1	female
84	7	6.5	16	90.93	4.23	26.1	31.9	1.6	290	11.15	44	8.2	female
68	2	1.2	7	0.8	165.05	26.9	45.9	0.9	206	3.31	77	1.9	female
40	5	0.1	4	6.59	18.25	30.5	13.2	0.9	116	2.71	41	1.5	female
68	16	3.0	12	0.8	0.18	25.3	23.7	0.6	76	1.57	84	0.8	male
100	6	4.3	15	10.24	0.49	27.8	59.8	1.2	172	4.7	50	3.0	female
90	2	11.3	23	31.63	5.98	24.6	167.7	1.3	388	8.49	43	6.2	female
91	11	17.1	33	32.83	0.35	31.1	102.3	1.3	106	7.06	76	5.4	female
71	6	0.6	9	1.20	168.41	29.9	89.5	1.6	152	4.15	92	1.9	female
98	9	3.4	12	11.68	0.78	29.3	123.5	0.9	138	6.54	39	5.1	female
69	2	1.0	7	1.38	56.57	24.5	11.0	2.5	260	6.61	41	3.7	female
66	12	3.2	11	20.00	0.35	35.6	74.2	0.8	95	2.69	71	1.5	female
47	2	2.8	12	6.00	401.95	25.5	34.8	1.5	159	3.36	51	1.5	male
36	5	0.7	7	1.31	6.77	27.8	16.0	1.0	162	4.63	69	2.8	female
90	1	13.0	25	0.8	20.66	28.5	52.4	1.2	161	6.75	63	5.3	female
82	12	6.5	16	7.07	48.35	30.5	14.0	0.9	181	6.78	32	5.1	female
85	2	5.6	15	6.59	3.13	33.0	70.3	0.7	139	5.37	44	4.2	female
70	2	3.3	13	1.00	37.82	25.8	36.1	2.6	313	6.03	62	2.4	female
95	14	4.0	12	49.13	0.51	33.4	140.0	1.0	76	4.42	70	3.1	female
96	6	15.1	28	133.00	4.35	31.6	156.3	0.7	152	9.76	150	7.3	female
89	2	3.7	13	3.23	13.93	26.5	120.5	1.0	381	10.55	64	8.7	female
71	8	0.1	5	9.00	4.64	27.1	42.1	1.0	248	3.86	47	2.4	female
92	5	12.8	27	6.80	0.76	34.2	129.3	0.4	218	6.16	115	5.4	female
85	4	0.1	4	2.08	36.75	28.8	5.0	2.4	244	6.87	49	3.9	female
92	1	0.1	6	1.04	14.04	25.2	20.1	1.6	173	7.17	129	4.8	female
79	2	4.6	14	1.76	22.44	22.2	48.7	1.2	177	4.68	47	3.1	female
88	2	3.3	15	3.22	69.92	29.0	62.0	1.5	289	6.13	94	4.1	male
73	6	6.3	19	0.8	0.33	25.3	107.0	1.0	149	4.77	75	3.1	male
93	2	2.8	11	53.13	14.85	31.0	77.6	1.7	268	5.87	58	3.3	female
98	3	6.0	16	1.75	30.47	29.9	48.7	1.8	238	6.94	82	4.7	female
87	8	1.1	7	0.8	1.46	25.9	66.1	0.7	159	4.02	98	2.4	male
82	5	1.3	8	1.80	1.69	22.8	141.4	2.0	158	10.38	94	7.9	female
95	6	8.9	23	44.41	4.39	24.6	235.0	1.2	300	5.57	64	4.0	female
24	5	1.4	20	4.43	59.29	27.9	40.3	2.0	349	6.16	56	3.3	male
90	7	2.2	8	1.37	43.84	22.0	33.0	1.5	215	8.48	46	6.4	female
73	8	0.1	6	0.8	0.78	28.7	14.3	1.4	145	3.22	60	1.4	female
93	2	1.9	10	12.77	55.02	25.4	56.6	2.9	224	7.74	65	3.9	female
75	1	2.1	10	4.26	0.75	24.8	60.9	1.3	216	7.49	63	5.4	female
73	2	5.3	15	31.28	420.61	25.8	43.6	2.2	253	7.99	62	5.2	male
63	1	0.1	6	0.8	441.8	28.3	30.6	3.0	235	8.86	54	5.4	male
82	5	3.2	11	0.8	372.99	30.7	63.3	1.1	124	3.57	93	2.0	male
93	10	0.3	6	5.79	0.27	28.2	16.7	1.0	183	3.1	67	1.7	female
94	7	7.1	16	10.43	4.06	37.9	283.0	0.4	276	13.26	103	12.7	female
91	21	2.9	11	58.95	0.69	29.7	165.0	1.5	220	9.38	95	7.1	female
98	4	11.0	22	88.88	7.85	25.6	15.0	0.3	168	17.59	147	16.3	female
68	5	0.1	7	0.80	48.51	27.9	15.9	1.4	279	6.42	78	4.5	female
77	2	8.9	23	0.80	269.85	25.9	27.3	1.0	237	6.41	86	4.9	male
53	12	0.6	8	0.95	75.08	27.9	37.4	2.5	228	4.36	54	1.5	male
58	2	0.1	5	1.47	416.54	27.1	17.6	2.2	229	6.98	48	4.2	male
88	15	1.5	10	9.33	3.76	25.6	46.1	1.5	155	3.88	83	1.9	female
87	16	6.3	17	0.8	0.37	30.0	48.1	1.6	95	4.91	58	2.7	female
84	2	0.3	7	0.8	380.22	29.2	40.2	1.3	191	6.49	120	4.4	male
89	12	8.4	22	4.20	19.04	26.2	18.9	0.8	110	3.66	47	2.6	female
71	2	1.5	9	2.88	26.18	23.6	16.1	1.6	257	7.35	63	5.2	female
90	5	4.4	12	84.85	15.35	37.4	271.0	1.1	434	7.21	115	5.2	female
57	6	0.6	9	2.62	101.02	29.6	20.0	1.6	272	5.49	37	3.6	female
96	13	0.1	5	4.98	0.18	32.0	75.7	1.8	167	4.43	109	2.4	female
91	7	3.8	12	64.75	27.49	26.5	208.8	1.1	98	26.91	183	24.9	female
88	9	14.3	30	25.18	0.43	33.7	149.8	0.6	109	5.24	77	3.9	female
70	7	9.8	22	12.28	119.79	35.3	80.1	0.4	276	11.76	69	10.6	female
48	23	0.6	8	2.71	0.21	33.7	43.9	0.8	157	3.52	129	2.0	female
97	2	1.6	13	9.10	30.84	23.6	228.4	0.8	215	7.21	314	6.2	female
74	1	2.6	11	0.8	5.14	33.5	47.2	1.7	204	8.34	75	6.1	female
86	7	2.8	11	36.39	14	30.1	100.8	0.6	232	6.16	43	5.1	female
79	9	3.4	13	1.92	0.15	30.5	38.0	2.2	200	6.18	53	3.5	female
67	11	0.1	7	11.23	3.69	32.2	56.1	1.0	185	7.28	61	5.8	female
71	9	9.4	20	5.67	7.46	29.4	62.0	0.5	97	1.82	61	1.0	female
87	2	4.9	16	1.42	0.58	24.9	154.6	1.7	358	6.73	72	4.2	female
69	10	4.1	11	10.26	22.8	27.8	28.3	1.4	155	6.71	59	4.5	female
92	8	0.6	9	0.95	0.46	23.6	62.1	0.2	94	7.34	71	6.5	female
68	3	2.3	12	4.00	0.56	25.3	60.0	1.3	244	3.54	62	1.8	female
95	14	2.4	9	1.84	0.55	31.5	64.0	0.9	79	2.23	66	1.0	female
89	12	0.1	6	0.8	0.25	27.1	256.6	1.3	142	5.14	154	2.6	female
78	3	6.4	16	9.81	0.36	35.7	115.3	1.7	177	5.39	49	3.0	female
78	2	0.4	14	0.8	401.06	26.5	90.2	1.9	255	6.98	66	4.2	male
97	2	8.0	19	6.60	25.39	28.5	6.5	1.2	100	12.24	42	10.7	female
66	2	5.0	15	0.8	330.26	23.8	29.4	1.8	228	5.06	72	2.5	male
87	3	5.2	14	3.04	1.2	30.2	43.2	1.6	301	7.06	54	4.6	male
70	8	4.2	14	1.64	111.95	29.3	50.6	1.4	156	5.49	64	3.1	female
86	2	19.2	36	19.37	7.4	26.6	289.9	0.8	475	8.85	72	7.4	female
79	5	9.2	22	1.15	100.13	26.0	37.7	2.1	244	7.95	36	4.8	female
80	4	0.1	7	3.28	0.97	30.5	111.0	1.5	205	6.13	96	3.8	female
82	17	4.8	15	13.71	3.36	28.5	120.2	0.3	143	6.16	66	5.4	female
83	5	7.6	15.61	114.9	0.86	25.6	163.1	1.37	154	7.56	54.4	5.62	male
85	1	10.07	18.16	157.08	81.27	25.4	61.09	0.76	251	9.68	68	8.11	female
82	2	11.11	13.09	191.47	194.35	24.8	514.2	0.25	273	9.12	286	8.48	male
61	2	6.88	8.71	94.12	0.97	31.6	971.59	1.25	306	19.38	254	17.72	male
74	2	15.5	18.82	3.49	142.14	26.1	347.6	0.72	317	10.15	79	8.35	male
51	7	26.79	30.04	35.33	0.08	34.7	74.33	1.58	108	4.44	90	2.44	male
81	2	5.25	8.61	2.53	0.57	30.5	57.69	1.54	181	3.9	104	1.78	male
65	1	8.15	13.2	4.78	1.64	29.1	46.07	1	234	4.19	91	2.83	male
82	3	3.58	7.68	0.54	0.02	25.6	138	1	252	3.26	351.6	1.77	female
49	3	14.96	22.37	1.84	0.86	27.3	19.9	1.7	350	5.48	42.8	3.09	female
55	3	1.78	4.17	87.21	0.39	21.3	1483.88	0.51	145	6.47	2340.6	4.72	male
80	4	6.77	7.38	98.32	151.36	28.8	31.87	0.29	372	18.72	52	17.77	female
67	3	3.58	7.5	16.21	0.19	23.2	436.78	1.16	159	6.73	47	4.81	female
47	4	2.79	4.77	0.99	0.03	27.9	20.5	1.7	129	3.51	45	1.29	female
55	11	8.99	15.07	25.37	1.78	25.3	44.87	0.19	159	18.89	46.8	17.98	male
57	2	2.78	5.37	2.36	0.07	26.8	128.53	0.65	148	4.15	71	3.08	female
77	2	6.07	8.21	154.95	1.67	29.1	229.54	0.87	375	17.96	57	16.24	female
50	3	2.3	4.38	132.38	1.5	34.3	19.9	0.92	353	9.84	28.9	7.72	female
54	3	5.43	10.27	1.58	0.1	26.3	32.7	2.43	120	4.8	55.7	1.49	male
34	4	4.61	11.38	1.89	237.56	31.7	19.9	2.97	208	7.4	47.6	3.72	female
48	3	3.22	7.02	10.23	3.02	28.3	19.9	0.79	137	2.98	54.8	1.81	male
32	4	4.25	10.29	1.32	47.53	27.6	19.9	3.17	116	7.26	60.1	3.24	female
74	2	2.05	5.25	10.27	1.78	24.5	512.17	1.37	197	8.33	746.8	6.39	female
20	4	2.23	5.89	1.8	0.01	23.6	25.37	1.39	238	2.25	49.1	0.6	female
61	3	2.49	6.02	12.09	561.18	26.4	19.9	2.13	190	5.82	79.4	2.59	male
64	0	8.69	15.44	32.94	183.45	26.6	100.45	1.25	164	5.01	84	3.31	male
78	2	6.19	10.23	62.94	0.06	27.9	24.91	0.5	178	2.96	47	2.26	male
86	3	21.66	22.45	3.09	0.25	28.3	137.6	0.48	88	4.68	161	3.86	male
85	4	5.81	8.4	184.98	0.67	31.1	640.53	0.2	193	7.78	84	7.17	male
70	2	207.19	268.32	194.58	0.45	73.1	72.95	0.82	82	1.57	236.7	0.63	male
79	8	8.48	8.6	202.57	0.72	45	2260.74	0.67	126	11.23	217	10.12	female
79	7	5.97	15.37	153.68	0.1	39.7	1524.8	0.38	98	7.33	108	6.43	female
57	6	3.26	5.82	15.25	0.37	27.3	45.23	1.07	205	3.93	72	2.38	female
75	6	3.87	6.43	11.53	0.36	24.4	23.89	0.84	277	3.76	117	2.02	male
85	10	5.23	8.8	87.63	0.03	30.6	85.81	0.51	112	5.87	142	4.01	male
82	7	6.36	9.42	65.09	0.03	35.4	253.8	0.58	221	4.02	45	3.01	male
82	1	8.16	9.96	160.81	0.34	34.7	757.6	0.11	206	8.02	51	7.74	male
73	2	1.69	3.03	176.43	20.6	31.5	4001	0.15	103	6.47	821	6.14	male
66	1	21.63	22.72	170.44	6.44	24.3	580.67	0.84	166	19.69	84	17.51	male
79	1	6.3	11.75	161.42	1.98	31.4	2469.1	0.64	80	9.76	608	8.93	male
87	7	20.28	21.1	189.47	2.15	47.1	637	0.31	44	6.33	136	5.89	male
80	1	8.45	8.5	173.03	0.03	34.3	274.46	0.19	139	13.17	48	12.75	female
59	13	4.45	7.68	184.88	0.02	35.9	1434.25	0.65	240	10.64	1546.8	9.66	male
84	2	9.8	19.12	193.25	2.97	36.1	691.81	0.25	127	6.75	469	6.19	male
64	7	4.26	5.9	188.82	0.21	34.6	1638.17	0.49	52	5.41	124	4.64	male
91	6	3.15	4.96	62.66	0.02	32.8	108.92	4.09	166	6.48	112.3	1.84	male
78	7	7.49	10	25.34	0.02	36.6	429.82	0.69	189	14.24	73	13.28	male
57	1	50.9	58.94	69.4	0.14	57.6	79.3	1.49	282	9.11	106	6.71	male
80	2	14.27	21.04	20.45	376.77	58.5	796.98	0.87	165	7.56	162	6.07	male
68	7	4.08	6.91	183.42	1.22	34.3	37.46	0.61	311	6.4	35	5.56	male
68	2	4.83	5.23	168.17	0.03	34.6	1465.3	0.43	274	8.5	916	7.52	male
82	3	35.53	51.95	37.74	102.37	42.9	45.64	0.42	72	5.54	85	4.51	male
55	2	10.97	11.98	24.85	215.33	27.2	19.9	2.39	108	7.25	50	4.38	female
82	5	9.73	11.88	108.75	0.02	39.6	291.58	0.18	113	2.18	94	1.85	female
48	4	43.56	46.57	61.78	150.35	25.5	268.3	1.26	126	6.8	61.78	4.5	male
53	3	9.6	13.72	7.25	20.41	34.6	103.88	0.7	185	6.36	296	5.05	male
75	1	6.29	10.7	43.41	304.06	28.3	470.9	0.53	223	8.2	108	7.08	male
81	2	10.3	15.86	1.22	2.73	30.4	179.16	1.03	141	5.93	86	4.15	female
70	1	2.62	4.31	1.19	113.6	36.9	19.9	4.06	461	8.55	47	3.7	female
57	2	10.64	10.99	177.27	0.05	36.9	446.91	0.41	46	5.21	442	4.21	male
92	2	10.79	14.55	33.15	3.9	33.3	99.2	0.39	162	4.52	64	3.6	male
81	1	10.11	10.79	14.48	0.05	37.3	85.63	1.2	72	4.28	85	2.35	female
85	3	6.1	9.25	73.62	4.92	24.1	213.6	0.67	294	11.87	151	10.26	male
88	2	5.89	10.1	188.56	0.04	37.8	280.3	0.43	116	7.82	136	6.55	male
59	1	3.31	6.11	1.57	42.09	25.9	19.9	2.4	192	5.23	50	2.2	female
40	1	4.58	10.42	4.98	1.02	27.1	19.9	1.9	197	4.26	82	1.72	male
92	2	7.35	14.48	5.23	3.95	30.3	30.64	1.41	86	6.67	56	4.6	female
53	1	5.43	10.53	197.91	600.94	32	33	2.32	344	10.74	213	7.29	male
79	1	7.01	14.75	6.41	0.62	27.9	48.25	1.39	266	5.9	63	3.71	female
63	1	4.7	14.69	38.43	0.62	43	581.46	0.11	94	3.3	790	3.03	male
83	3	10.55	17.66	193.63	10.86	36.7	187	0.82	62	13.17	149.5	11.67	male
61	1	16.69	17.55	178.01	1.14	31	1355.86	0.34	83	4.54	52	4.14	male
78	1	8.01	8.08	171.27	0.07	30.8	1915.03	0.99	117	7.28	284	5.92	male
79	1	14.67	21.09	133.92	131.5	23.9	92.23	1.11	185	12.84	96	10.82	male
77	2	9.51	13.35	184.15	0.07	33.9	96.23	0.25	129	2.33	83	1.97	female
75	3	4.67	5.31	46.23	0.18	31.3	75	0.2	189	4.89	106	4.44	female
75	1	15.67	17.5	100.99	0.34	32.5	136.35	0.15	182	16.38	155	15.88	female
70	4	22.17	29.9	177.5	0.13	33.9	651	0.22	110	10.62	157	10.02	male
70	2	15.32	16.05	162.39	0.71	31.6	210.75	0.22	113	9.36	180	8.65	male
72	2	6.71	14.65	12.12	71.32	24.4	2317.85	0.98	89	13.83	124	11.75	male
72	0	4.98	7.58	37.53	77.57	25.1	723.9	0.44	87	12.54	115	11.7	male
60	1	6.56	8.63	4.76	2.2	33.5	316.8	0.6	193	3.84	34	2.93	female
74	5	12.01	20.45	189.19	0.49	41.9	533.83	0.34	56	4.3	103	3.85	male
76	7	3.7	5.19	20.36	42.1	25.4	815.16	0.88	146	6.92	1207	5.39	male
69	7	4.32	6.13	111.98	1.41	30.5	308.01	2.56	45	9.59	75	7.38	female
67	2	6.11	11.21	70.09	140.01	29.1	82.05	1.02	389	12.74	58	11.24	male
40	1	2.66	2.84	27.75	45.92	20.2	36.59	0.65	337	15.41	84	13.35	female
78	5	7.23	15.33	192.26	0.06	28.8	1557.63	2.16	147	13.08	254.2	9.64	male
78	2	10.87	12.19	156.24	0.26	31	769.8	0.96	141	8.21	433	6.94	male
73	1	4.46	10.82	0.39	0.14	22.2	122.7	1.81	318	9.37	63	7.07	female
58	1	2.1	3.51	15.23	0.52	25.2	462.35	1	178	4.46	407	2.95	male
68	2	6.8	9.44	190.25	0.53	29.9	59	0.19	245	8.27	77	7.62	male
83	1	3.91	6.69	34.63	0.89	28.8	47.74	2.19	309	8.68	55	5.74	female
54	4	4.99	11.31	4.29	0.29	27.1	161.26	0.66	127	5.56	76	4.31	male
86	1	6.45	11.44	14.23	1.97	22.5	55.16	0.39	261	6.7	91	5.89	female
43	2	6.62	15.98	16.65	106.57	16.5	79.1	1.42	205	12.15	55	9.99	female
88	1	12.45	17.93	109.76	0.09	33	96.32	0.43	94	3.78	99	5.99	male
27	1	2.81	10.14	65.86	2.45	17.6	49.54	0.46	319	11.23	42	10.13	female
49	2	1.99	2.39	114.31	0.05	29.4	298.11	0.37	230	15.73	2216	15.11	male
78	5	4.84	6.37	5.15	0.17	26.2	295	0.4	51	2.53	88	1.46	male
65	4	4.92	8.66	23.29	10.32	31.7	81.99	3.33	237	7.26	123	3.2	male
49	7	3.06	5.14	3.6	1.32	35	28.06	1.86	185	6.14	57	3.52	female
46	6	3.91	7.28	0.2	1.45	28.2	19.9	1.43	251	4.46	75	2.12	female
36	7	6.52	15.82	16.27	1.59	29	45.4	2.09	161	6.31	92	3.27	male
57	7	3.8	4.89	6.36	1.13	29.5	30.3	1.02	182	3.67	53	2.21	female
32	7	3.82	5.47	0.4	16.59	27.3	19.9	1.86	245	9.57	57	7.01	female
38	6	15.86	30.34	2.78	5.23	24.2	20.42	1.6	166	4.45	89	2.23	male
49	2	1.35	4.12	1.95	0.2	26.4	27.35	3.17	377	8.63	107	4.39	male
19	2	1.49	4.02	0.73	0.68	29.1	19.9	2.81	263	7.1	113	3.56	male
59	11	4.12	6.07	1.2	0.04	33.4	35.89	0.99	198	7.91	79	5.95	male
33	11	3.41	4.97	3.91	30.75	29.6	19.9	0.88	227	4.27	66	2.76	female
55	8	6.69	11.59	5.4	0.32	28.2	29.9	0.81	128	3.84	93	2.41	male
69	2	6.09	13.16	11.57	0.65	23.2	34.71	2.42	146	5.18	72	1.92	female
34	7	4.91	10.62	7.4	0.47	29.9	32.52	0.43	266	5.02	54	3.91	female
58	1	5.06	8.31	144.67	0.11	30.2	38.09	0.52	247	4.76	54	3.57	male
38	6	3.47	5.42	6.3	62.58	29.2	19.9	1.19	225	4.83	66	2.55	female
91	1	5.16	8.38	58.09	48.83	38.2	55.59	1.03	235	4.28	80	2.72	male
60	5	4.29	8.16	7.3	18.25	27.3	19.9	1.97	195	5.66	59	2.54	female
36	1	5.01	3.19	7.6	17.1	28.6	19.9	2.04	294	4.55	55	1.95	female
41	6	5.62	11.47	1.4	3.48	33	19.9	3.38	308	9.24	75	4.9	male
93	1	11.53	21.32	24.89	3.53	34.3	691.07	1.17	328	7.65	77	5.52	male
54	4	3.35	5.52	13.2	7.44	25.5	19.9	1.36	147	3.75	63	1.94	female
62	2	3.35	5.52	13.2	8.85	26.2	19.9	1.36	229	3.91	57	1.49	female
54	4	120.98	138.75	61.82	153.94	27.6	53.55	0.33	240	7.22	62	6.56	female
48	6	3.36	3.91	3.51	3.19	29.5	19.9	0.71	150	4.19	65	2.82	female
28	6	3.26	4.7	1.1	3.71	29.9	19.9	1.25	187	5.38	44	3.58	female
53	2	15.74	36.09	186.8	9.11	24.3	62.46	1.22	175	13.15	77	11.28	male
22	6	2.52	3.67	3.8	15.38	31.8	19.9	1.25	178	5.98	62	3.96	female
30	6	10.33	17.02	1.8	2.35	31	32.83	1.75	287	4.31	74	2.06	female
41	6	3.42	5.21	1.76	20.78	27.9	19.9	0.92	156	3.45	78	2.07	female
43	1	4.96	16.48	0.31	2.61	26.4	19.9	1.65	161	4.48	76	2.54	male
47	4	3.4	5.63	6.79	14.38	30.1	19.9	1.24	218	3.96	55	2.04	female
22	6	3.29	5.02	16.2	0.87	33.2	19.9	0.88	212	2.78	53	1.53	female
78	1	4.94	9.47	39.85	0.98	35.2	82.48	0.26	100	3.37	51	2.87	female
30	6	4.68	9.76	1.8	7.36	31.6	21.67	1.43	182	4.52	91	2.52	male
56	2	10.07	14.75	77.27	23.41	21.5	49.7	2.37	410	11.27	48	8.35	female
50	6	3.89	6.5	13.2	3.94	28.2	19.9	1.55	182	7.64	92	5.18	male
47	6	3.96	6.98	0.7	0.03	31	35.38	1.48	157	4.65	71	2.59	male
32	4	4.07	8.95	1.42	10.95	42.7	19.9	2.53	181	4.55	97	1.35	male
57	6	3.01	4.97	9.95	2.03	33	104.81	0.99	201	4.62	85	3.06	male
34	3	3.11	4.75	4.23	0.95	30.2	19.9	1.3	182	3.43	55	1.76	female
47	11	5.32	12.33	0.04	0.87	26.4	31.64	1.71	316	3.93	45	2.33	female
72	1	8.6	13.01	9.93	107.95	22.3	319.4	0.41	48	2.04	167	1.43	female
36	1	6.07	13.43	16.65	409.52	33.3	19.9	2.3	306	6.32	56	3.27	male
81	0	9.18	13.98	0.96	6.68	26.7	30.2	1.67	144	4.59	67	2.1	female
74	1	3.36	10.16	0.19	136.62	26.2	37.62	2.09	99	5.8	60	3.11	female
81	5	3.12	4.63	64.91	0.03	31.3	80.81	0.84	364	9.05	120	7.67	female
46	2	3.3	7.87	1.93	26.12	26	19.9	0.95	424	3.15	53	1.69	female
54	2	226	237.38	46.45	0.12	36	19.9	1.13	300	7.12	42	5.28	female
65	0	6.32	12.76	11.09	3.44	25.9	19.9	2.18	504	5.98	33	3.01	male
66	0	11.34	23.45	0.92	11.67	24.3	19.9	2.18	194	7.35	47	4.49	female
29	2	9.8	16.24	5.2	14.72	28.4	43.36	2.42	289	5.6	99	2.18	male
60	2	8.32	15.66	3.3	0.49	25.5	31.84	1.91	277	3.9	69	1.52	female
78	1	5.74	9.79	64.56	285.5	26.7	55.48	0.53	228	15.6	175	14.26	female
77	2	5.68	9.65	9.39	77.98	33.8	50.08	1.21	207	3.72	83	1.89	male
61	0	50.21	66.26	26.36	14.2	30.3	74.97	0.68	145	7.11	48	5.87	male
72	2	18	34.42	59.73	197.58	28	152.13	1.22	206	7.48	74	5.29	male
53	4	6.91	11.53	29.53	0.02	35.3	291.8	0.42	67	3.61	99	3.11	male
58	5	9.88	10.09	66.14	0.27	36.2	357.01	0.34	41	6.93	584	6.26	male
53	1	3.98	5.07	22.03	0.47	33.3	19.9	1.17	112	4.96	380	3.3	male
78	11	8.3	10.21	183.39	0.76	27.3	90.32	10.32	90	17.83	84	7.38	male
57	3	2.72	4.85	4.51	0.26	26	650	0.74	178	4.58	1205	3.17	male
84	7	3.32	4.36	109.62	0.07	35.8	544.5	0.45	183	6.26	93	5.56	male
84	5	7.56	11.17	9.87	0.12	35.3	62.66	0.46	92	4.17	85	3.14	male
83	9	4.82	6.5	171.24	1.93	22.2	277.53	0.47	228	9.37	160	8.35	male
75	1	5.48	10.03	27.9	290	19.4	122.51	1.2	267	9.83	68	8.07	female
87	6	5	9.49	27.53	0.38	23.4	94.78	0.92	221	11.18	138	9.84	female
60	5	4.48	6.3	4.08	0.14	36.2	112.5	1.03	77	3.36	1065	2	male
80	15	7.19	9.01	29.62	0.06	36	267.55	0.57	105	2.22	1107	1.21	male
93	1	3.7	6.24	19.55	0.04	29.4	59.18	0.77	164	3.42	73	2.53	female
83	9	7.26	11.16	88.38	70.72	26.5	90.39	0.73	102	30.91	149	28.84	male
84	2	4.09	7.08	5.99	0.46	27.6	102.08	1.31	298	10.62	106	8.41	female
